# Supplementary material for: A DNA Aptameric Ligand of Human Transferrin Receptor Generated by Cell-SELEX
Source: MDPI journal article supplement (doi:10.3390/ijms22168923), 2021-08-19
Supplement: s1 [file s1]

## Supplementary Information

# A DNA Aptameric Ligand of Human Transferrin Receptor Generated by Cell-SELEX

Nan Zhang <sup>1,#</sup>, Tao Bing <sup>1,2,#</sup>, Luyao Shen <sup>1</sup>, Le Feng <sup>1</sup>, Xiangjun Liu <sup>1,2</sup>, and Dihua Shangguan <sup>1,2,3,\*</sup>

<sup>1</sup> Beijing National Laboratory for Molecular Sciences, Key Laboratory of Analytical Chemistry for Living Biosystems, CAS Research/Education Center for Excellence in Molecular Sciences, Institute of Chemistry, Chinese Academy of Sciences, Beijing, 100190, China; hszhang@iccas.ac.cn (N.Z.); bingtao@iccas.ac.cn (T.B.); shenluyao@iccas.ac.cn (L. S.); xjliu@iccas.ac.cn (X. L.)

<sup>2</sup> School of Chemical Sciences, University of Chinese Academy of Sciences, Beijing, 100049, China

<sup>3</sup> School of Molecular Medicine, Hangzhou Institute for Advanced Study, University of Chinese Academy of Sciences, Hangzhou, 310024, China

\* Correspondence: sgdh@iccas.ac.cn



Table S1. DNA sequences used in this work.

| name     | Sequences (5'-3')                                                                       |
|----------|-----------------------------------------------------------------------------------------|
| HF       | tttAAGCAGCGTGGAGGATATGCTTTCCGACCGTGTTTCGTTTGTTATAACGCTGCTtt                             |
| ctr sq   | AGAGCAGCGTGGAGGATAGTTGGGGTTTGGCAAGTATTG                                                 |
| sgc8     | CTAACTGCTGCGCCGCCGGGAAAATACTGTACGGTTAGA                                                 |
| HF3      | AAGGAGCAGCGTGGAGGATATGCTTTCCGACCGTGTTTCGTTTGTTATAACGCTGCTTAGGG<br>TGTGTCGTCGTGGT        |
| HD1      | AAGGAGCAGCGTGGAGGATAGGGTTGGGTTTGGTGTCTGGGTTGGCTGTTGGTGGCTTCC<br>GGTTAGGGTGTGTCGTCTGTGGT |
| HG1      | AAGGAGCAGCGTGGAGGATAGGGATTCTGTTGGTCGGCTGGTTGGTATCCTTAGGGTGTGT<br>CGTCGTGGT              |
| HG1-1    | AGGAGCAGCGTGGAGGATAGGGATTCTGTTGGTCGGCTGGTTGGTATCCTTAGGGTGTG                             |
| HG1-2    | AGGAGCAGCGTGGAGGATGTTGGTCGGCTGGTTGGTATCCTTAGGGTGTG                                      |
| HG1-3    | AGGAGCAGCGTGGAGGATAGGGATTCTGTTGGTCGGCTGGTTGGTATCC                                       |
| HG1-4    | GTGGAGGATAGGGATTCTGTTGGTCGGCTGGTTGGTATCCTTAGGGTGTG                                      |
| HG1-5    | AGGAGCAGCGTGGAGGATAGGGATTCTGTTGGTCGGCTGGTTGGT                                           |
| HG1-6    | TAACCAGCGTGGAGGATAGGGATTCTGTTGGTCGGCTGGTT                                               |
| HG1-7    | TAGGGATTCTGTTGGTCGGCTGGTTGGTATCCTTAGGGTGTG                                              |
| HG1-8    | GTGGAGGATAGGGATTCTGTTGGTCGGCTGGTTGGTATCC                                                |
| HG1-9    | GGATAGGGATTCTGTTGGTCGGCTGGTTGGTATCC                                                     |
| HG1-10   | GGCGAGGGATTCTGTTGGTCGGCTGGTTGGTCGCC                                                     |
| HG1-11   | GGCGACGGATTCTGTTGGTCGGCTGGTTGGTCGCC                                                     |
| c-HG1-9  | GGATACCAACCAGCCGACCAACAGAATCCCTATCC                                                     |
| c-ctr sq | CAATACTTGCCAAACCCCAACTATCCTCCACGCTGCTCT                                                 |



Table S2. Results of identification of target proteins by SILAC-MS method. TfR was the only protein with abundance ratio (HG1-9 / ctr) greater than 20.

| <i>Refseq<br/>protein<br/>accession</i> | <i>Name of<br/>gene</i> | <i>Description</i>                                                | <i>Number of<br/>Specific<br/>peptides</i> | <i>Coverage<br/>rate of<br/>sequences<br/>[%]</i> | <i>PEP</i> | <i>Abundance<br/>ratio of protein<br/>(HG1-9 /ctr<br/>sq)<sup>[b]</sup></i> |
|-----------------------------------------|-------------------------|-------------------------------------------------------------------|--------------------------------------------|---------------------------------------------------|------------|-----------------------------------------------------------------------------|
| NP_003225                               | TFRC                    | Transferrin receptor protein 1                                    | 18                                         | 23.8                                              | 4.7E-59    | <b>&gt;20</b>                                                               |
| NP_071415                               | MCCC2                   | 3- methyl CoA coenzyme A<br>carboxylase $\beta$ chain             | 25                                         | 52.9                                              | 0.0E+00    | 0.9 $\pm$ 0.2                                                               |
| NP_064551                               | MCCC1                   | 3- methyl CoA coenzyme A<br>carboxylase $\alpha$ chain            | 22                                         | 33.9                                              | 0.0E+00    | 0.9 $\pm$ 0.1                                                               |
| NP_000273                               | PCCA                    | propionyl-CoA carboxylase alpha<br>subunit                        | 39                                         | 52.7                                              | 0.0E+00    | 0.9 $\pm$ 0.2                                                               |
| NP_942131                               | ACACA                   | acetyl-CoA carboxylase alpha                                      | 94                                         | 51.5                                              | 0.0E+00    | 0.9 $\pm$ 0.2                                                               |
| NP_071504                               | PC                      | pyruvate carboxylase                                              | 61                                         | 67.3                                              | 0.0E+00    | 1.0 $\pm$ 0.1                                                               |
| NP_000402                               | HLCS                    | holocarboxylase synthetase                                        | 11                                         | 15.8                                              | 6.7E-80    | 1.0 $\pm$ 0.2                                                               |
| NP_000523                               | PCCB                    | propionyl-CoA carboxylase beta<br>subunit                         | 28                                         | 62.1                                              | 0.0E+00    | 0.9 $\pm$ 0.2                                                               |
| NP_003312                               | TUFM                    | Tu translation elongation factor,<br>mitochondrial                | 10                                         | 27.3                                              | 1.3E-76    | 0.8 $\pm$ 0.2                                                               |
| NP_006784                               | PRDX3                   | peroxiredoxin 3                                                   | 3                                          | 11.3                                              | 5.9E-12    | 0.9 $\pm$ 0.0                                                               |
| NP_000013                               | ADA                     | adenosine deaminase                                               | 6                                          | 27.3                                              | 9.7E-49    | 0.8 $\pm$ 0.1                                                               |
| NP_066964                               | XRCC5                   | X-ray repair cross complementing 5                                | 12                                         | 21.3                                              | 4.2E-50    | 1.5 $\pm$ 0.7                                                               |
| NP_006089                               | GNB2L1                  | guanine nucleotide binding protein,<br>beta 2, related sequence 1 | 4                                          | 15.5                                              | 7.4E-12    | 0.9 $\pm$ 0.3                                                               |
| NP_003134                               | SSBP1                   | single stranded DNA binding protein<br>1                          | 8                                          | 58.1                                              | 1.4E-126   | 6.5 $\pm$ 2.8                                                               |
| NP_004125                               | HSPA9                   | heat shock protein family A (Hsp70)                               | 11                                         | 18.1                                              | 8.6E-86    | 0.9 $\pm$ 0.3                                                               |
| NP_005909                               | MDH2                    | malate dehydrogenase 2                                            | 5                                          | 19.5                                              | 6.2E-11    | 1.0 $\pm$ 0.1                                                               |
| NP_006073                               | TUBA1B                  | tubulin alpha 1b                                                  | 11                                         | 27.7                                              | 4.7E-120   | 1.1 $\pm$ 0.4                                                               |
| NP_002148                               | HSPE1                   | heat shock protein family E (Hsp10)<br>member 1                   | 4                                          | 29.4                                              | 4.4E-21    | 0.8 $\pm$ 0.2                                                               |
| NP_002406                               | MIF                     | macrophage migration inhibitory<br>factor                         | 2                                          | 17.4                                              | 3.2E-14    | 1.4 $\pm$ 0.3                                                               |
| NP_002147                               | HSPD1                   | heat shock protein family D (Hsp60)<br>member 1                   | 29                                         | 57.1                                              | 7.8E-298   | 0.8 $\pm$ 0.2                                                               |
| NP_002159                               | IDH2                    | isocitrate dehydrogenase (NADP(+))<br>2, mitochondrial            | 7                                          | 14.4                                              | 3.7E-20    | 0.9 $\pm$ 0.3                                                               |
| NP_000468                               | ALB                     | albumin 69 kDa                                                    | 5                                          | 13.9                                              | 3.2E-44    | 0.8 $\pm$ 0.7                                                               |
| NP_006588                               | HSPA8                   | heat shock protein family A (Hsp70)<br>member 8                   | 14                                         | 29.1                                              | 1.5E-93    | 1.8 $\pm$ 0.9                                                               |
| NP_859047                               | PRDX1                   | peroxiredoxin 1                                                   | 5                                          | 22.1                                              | 4.0E-15    | 1.1 $\pm$ 0.4                                                               |

<sup>[a]</sup> PEP represents posteriori error estimation; <sup>[b]</sup> represents ratio of forward sample and backward sample, the data were repeated two times and expressed as means  $\pm$  S.E.



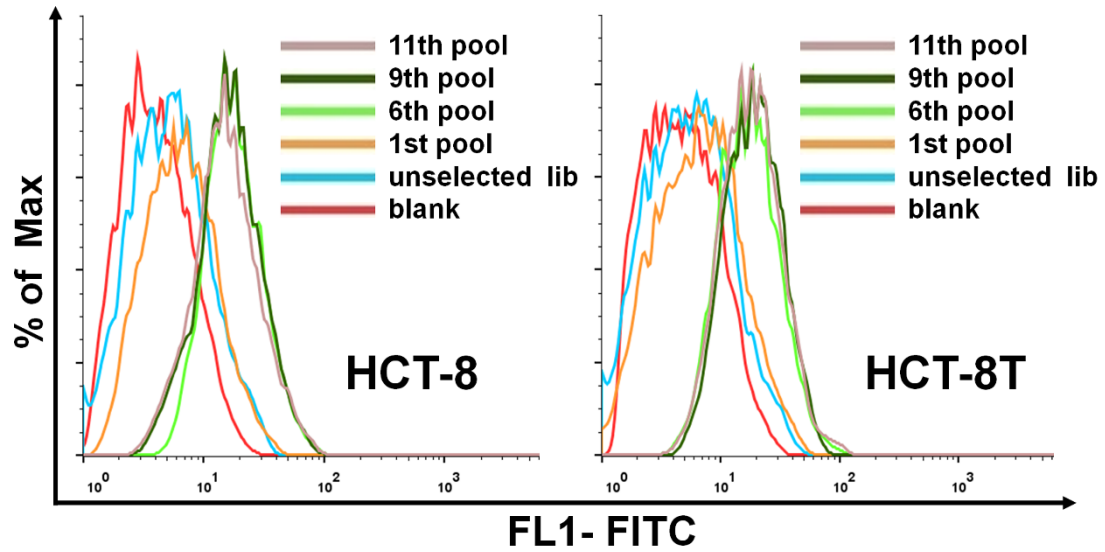

Figure S1. Monitoring enrichment of cell-SELEX process. Histogram of fluorescence intensity of selected ssDNA pool on HCT-8 (A) and HCT-8T (B) by flow cytometry. Unselected lib is as the negative control.

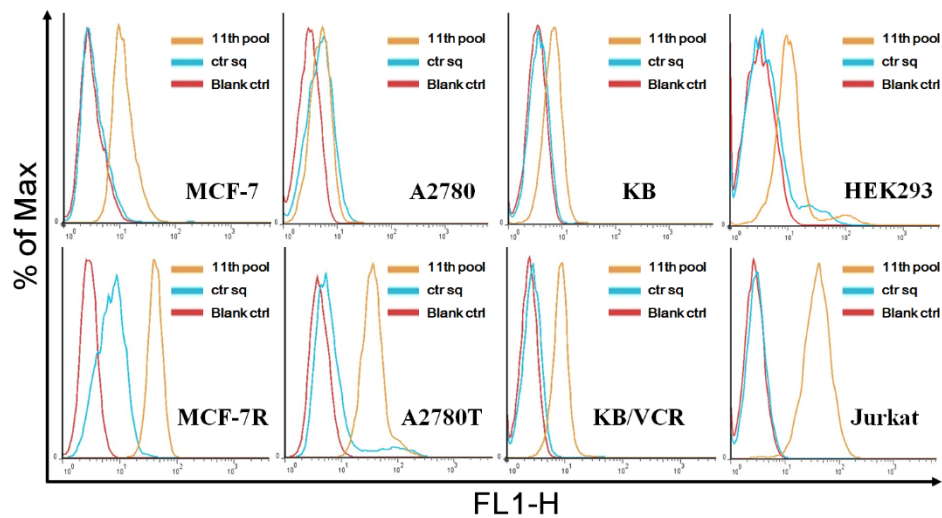

Figure S2. Flow cytometry analysis of the evolved 11th pool binding to different cell lines. The ctr sq was as negative control.



10 20 30 40 50

```

HF2/1-45 GACGAACAGTCACGGATCGTAGTAGTAGTTAGCATGC-TA-----GT--
HF5/1-45 -----GTCGTGATTATTGGTGGTTAAGTGGCGGTCACGGTACTAGCTCTC---
HF2/1-45 -----GTCGTGATTATTGGTGGTTAGGTGGCGGTCACGGTACTAGCTCTC---
HA4/1-45 -----GTCGTGACTATTGGTGGTTAGGTGGCGGTCACGGTACTAGCTCTC---
HF1/1-45 -----CTCCCGCGCTTTTATTGCTTGTGTGTCGGTCTGCTTCCTTTTCCC-----
HA4/1-45 -----GGCCCGATCGGTTTCTTGTCTTACAAGCCTTCAGCTTCAGCAGCC-----
HH4/1-45 -----TGGTCCGACCGTTTTGCTTTGTTACAGACGGTGCTTCGCTCCGCG-----
HA6/1-33 -----GGGTCCGACCGTGTTCGTTTGTATAACGCTGC-----
HF3/1-35 -----TGCTTTCCGACCGTGTTCGTTTGTATAACGCTGC-----
HE2/1-35 -----TGCTTTCCGACCGTGTTCGTTTGTATAACGCTGC-----
HA5/1-46 -----GGGTGGTTATGATTGGCTAGGGCCGGTC-TCTTCTAAGCTGTGGATA
HE7/1-46 GG-GGTCGGAGTGGGTGGTTATGATTGGCTCTTCT-----GCCTGCGCCT-
HF7/1-46 GG-GGTCGGCGTGGGTGGTTATGATTGGCTTCTCT-----GCACTGCGCC-
HB2/1-45 GG-GGTCGGTGTGGGTGGTTATGATCGGCTTCTCT-----GCCTGCGCCT-
HC3/1-30 GG-----GATTCTGTTGGTCGGCTGGTTGGT--A-TT-----C-----
HG1/1-30 GG-----GATTCTGTTGGTCGGCTGGTTGGT--A-TC-----C-----
HD5/1-30 GG-----GATCCTGTTGGTCGGCTGGTTGGT--A-TC-----C-----
HD1/1-42 -----GGGTTGGGTTTGGTGTCTGG--GTTGGCTGTTGGTGGCT--TC-----CGG-----
HE1/1-43 -TAGGTTGGCTTAGGTGGCTTTCGTTGGGTGTGGTGCATA-TC-----C-----

```

Figure S3. 19 cloned sequences (figure shows the random parts) were analyzed and aligned up by Clustal Omega program after merging the repeated sequences. The sequences in red boxes are HF3 (repeated 8 times), HG1 (repeated 13 times) and HD1 (repeated 9 times) are most abundant DNA sequences.

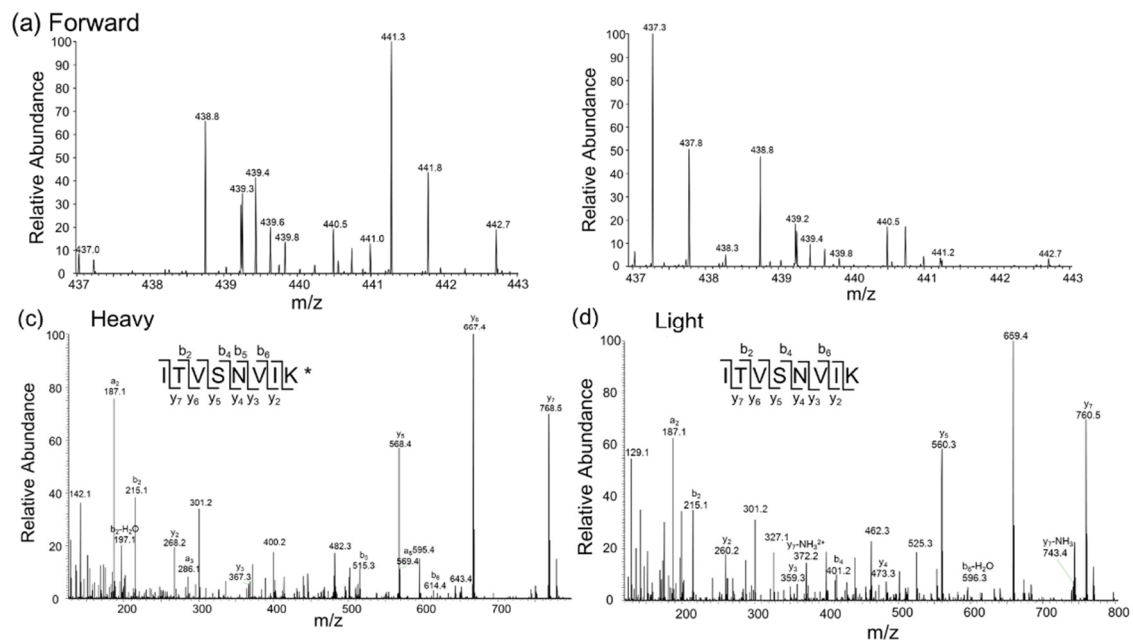

Figure S4. Representative ESI-MS and MS/MS of a tryptic peptide from human Transferrin Receptor.  $\text{K}^*$  designates the heavy lysine. Shown in (a) and (b) are the ESI-MS for the heavy ( $m/z$  441.3 for the monoisotopic peak of the  $[\text{M}+2\text{H}]^{2+}$  ion) and the light ( $m/z$  437.3 for the monoisotopic peak of the  $[\text{M}+2\text{H}]^{2+}$  ion) lysine-containing peptide observed in forward and reverse SILAC experiments. Displayed in (c) and (d) are the MS/MS for the  $[\text{M}+2\text{H}]^{2+}$  ions of the heavy- and light-lysine-bearing peptide.



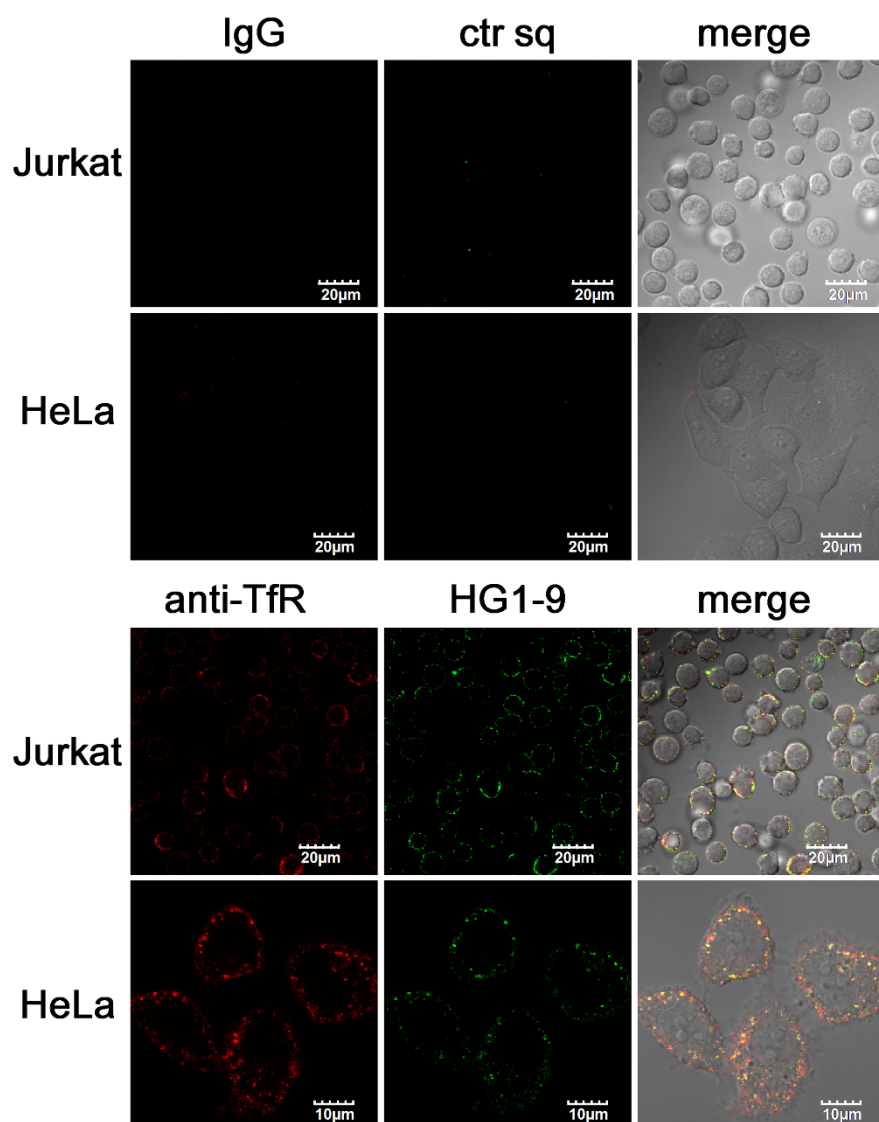

Figure S5. Confocal imaging of Jurkat and HeLa cells dual-stained by aptamer HG1-9 (labeled by FAM) and antibody anti-TfR (labeled by PE), and ctr sq (labeled by FAM) and iso-type control IgG (labeled by PE).



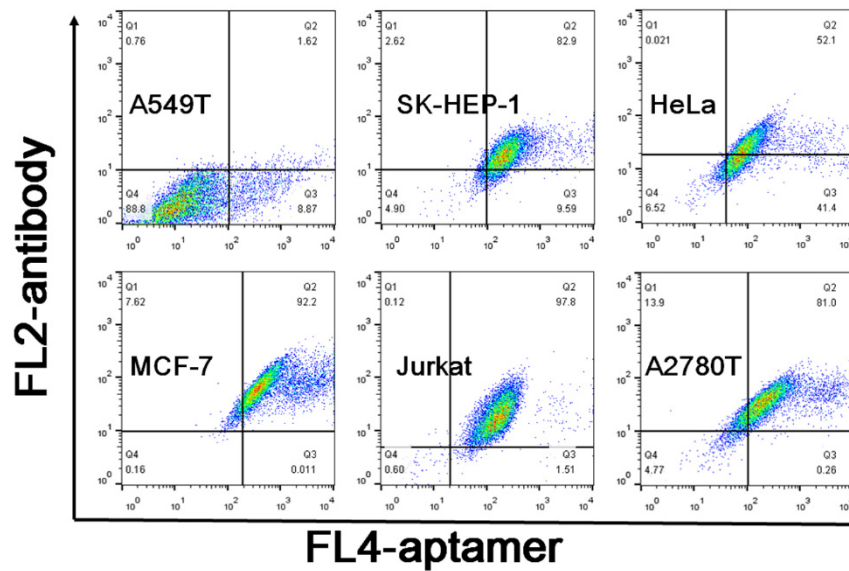

Figure S6. Flow cytometry analysis of different cell lines dual-stained by aptamer HG1-9 (labeled by Cy5) and antibody anti-TfR (labeled by PE). The cross-quadrant gate in each bivariate histogram was respectively set according to negative control in different cell lines.

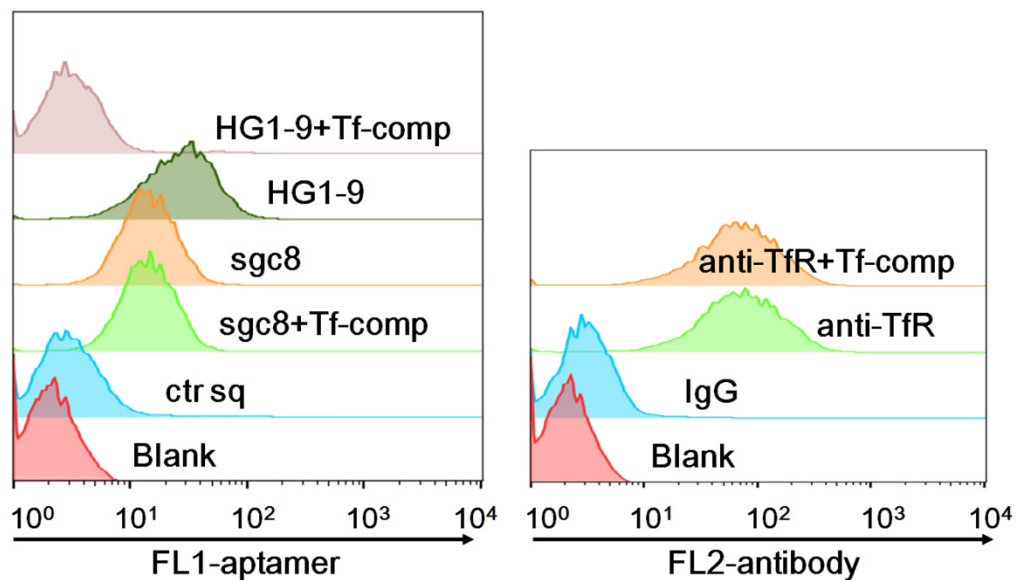

Figure S7. Flow cytometry analysis of aptamer and antibody binding to Jurkat cells with or without competition to holo-Transferrin (Tf). Aptamer sgc8 was the negative control.
